# Supplementary material for: Preparation of N, P co-doped flake-like carbon materials and their application in counter electrodes of dye-sensitized solar cells
Source: Research Square preprint supplement (doi:10.21203/rs.3.rs-6912969/v1), 2025-08-29
Supplement: Supplementary file 1 [file 4ab77bbe79fdc9b31c2783b9.docx]

**Supporting Information**

**Preparation of N, P co-doped flake-like carbon materials and their application in counter electrodes of dye-sensitized solar cells**

Jinzhong Wanga, Yikai Linga, Ti Lianga, Rui Tiana,Yanan Lia, Guangzai Nonga,b,c,*

a School of Resources, Environment and Materials, Guangxi University, Nanning, Guangxi, 530004, P. R. China.

b School of Light Industry and Food Engineering, Guangxi University, Nanning, Guangxi, 530004, P. R. China.

c Guangxi Key Laboratory of Clean Pulp & Papermaking and Pollution Control, Nanning, Guangxi, 530004, P. R. China.

*Corresponding author: Guangzai Nong, Email: [gz.nonginguilin@163.com](mailto:gz.nonginguilin@163.com).

Main Metarial

Phytic acid (99%, Aladdin), Titanium dioxide (99.8%, Macklin), Ethyl cellulose (AR, Macklin), Melamine (99.8%, Aladdin), Terpineol (98%, Picasso), Ethanol (C2H3O) (AR, Aladdin), Acetone (C3H6O) (AR, Macklin), Isopropyl alcohol (C3H8O) (AR, Macklin), Carbon tetrachloride (TiCl4) (99%, Macklin), Chloroplatinic acid (H2PtCl6) (99.8%, Picasso), Ethanol (C2H6O) (AR, Aladdin), Iodine (I2) (99.5%, Aladdin), Lithium iodide (LiI) (99%, Macklin), Lithium perchlorate (LiClO4) (99.9%, Picasso), N719 dye (98%, Picasso), 1,2-Dimethyl-3-propylimidazolium iodide (C8H15IN2) (99%, Bide), 4-tert-Butylpyridine (C9H13N) (99.4%, Ron), Guanidine thiocyanate (C₂H₆N₄S) (≥99%, Macklin), Acetonitrile (C2H3N) (99%, Aladdin), Potassium hydroxide (KOH) (analytical grade, Aladdin), UV adhesive (JIANEN, Wenzhou Anergu Company), EVA hot-melt film (0.1mm, Tonggao Technology), Conductive glass (FTO) (GULUO, Luoyang Tengjing Glass Co., Ltd.), Scotch tape (3M, Shenzhen Huiyoujia).

2.3.2 Preparation and Assembly of DSSCs

2.3.2.1 Preparation of the Photoanode

a. Pre-treatment of FTO Conductive Substrate

Fluorine-doped tin oxide (FTO) conductive glass (2.0×2.0 cm²) was pre-treated by creating a micro-hole array with a diameter of 0.8 mm on part of the FTO surface using a laser drilling machine (hole spacing 1.5 mm). The FTO was then subjected to multi-level ultrasonic cleaning (20 min per level): deionized water (3 times) → anhydrous ethanol (99.9%, 1 time) → acetone (HPLC grade, 1 time) → isopropanol (AR grade, 1 time). The cleaned FTO was soaked in fresh isopropanol solution and stored sealed for less than 24 hours.

b. Construction of the TiO₂ Nanocrystalline Adsorption Layer

Photoanode slurry preparation: Anatase TiO₂ nanoparticles (10-25 nm, 1.0 g), ethyl cellulose (0.5 g), terpineol (3 mL), and anhydrous ethanol (10 mL) were mixed together. The slurry was stirred using a magnetic stirrer (200 rpm) until the ethanol completely evaporated, resulting in a thick white paste. The paste was then screen-printed onto the conductive surface of the FTO (effective area 0.25 cm²), with the film thickness controlled at around 15 μm. The coated sample was placed in a muffle furnace, with the heating rate set at 2°C/min, heated to 500°C and held for 30 min to form a porous TiO₂ adsorption layer.

c. TiCl₄ Post-treatment and Dye Sensitization

The sintered FTO was immersed in a 40 mM TiCl₄ aqueous solution (70°C, 30 min) and then rinsed three times with deionized water and anhydrous ethanol. Drying treatment: The sample was dried in an oven at 90°C for 1 h, followed by a second sintering (500°C, 30 min, heating rate 2°C/min). Dye loading: The sample was immersed in a 0.5 mM N719 dye ethanol solution (protected from light, 24 h). After removal, the sample was rinsed with ethanol to remove physically adsorbed dye and then dried with nitrogen for later use.

2.3.2.2 Preparation of the Counter Electrode

a. Carbon-based counter electrode preparation: P@C-X (150 mg), ethyl cellulose (10 mg), and Triton X-100 (surfactant, 50 μL) were ground in an agate mortar for 30 min to form a uniform paste. Screen printing: The slurry was coated on the pre-drilled FTO surface (effective area 0.25 cm²) using a 300-mesh screen. Inert atmosphere sintering: The sample was placed in a tube furnace and heated to 500°C at a rate of 2°C/min under N₂ protection (flow rate 50 sccm) and held for 30 min, then cooled to room temperature with the furnace.

b. Platinum-based counter electrode preparation (control sample)

Template method preparation: A piece of Scotch tape (thickness 100 μm) was attached to the clean FTO surface to form a patterned area of 0.5×0.5 cm². H₂PtCl₆ loading: A 5 wt% H₂PtCl₆/isopropanol solution (2×20 μL) was drop-coated into the groove, dried at room temperature for 20 min, and then placed in a muffle furnace. The sample was heated to 450°C at a rate of 5°C/min in air and held for 30 min to obtain a Pt nanoparticle-decorated electrode.

2.3.2.3 Preparation of the Electrolyte

The electrolyte was prepared using acetonitrile (10 mL) as the solvent, with the following component concentrations: 1-butyl-3-methylimidazolium iodide (BMII, 0.6 mol), lithium iodide (LiI, 0.06 mol), elemental iodine (I₂, 0.03 mol), guanidinium thiocyanate (GuSCN, 0.1 mol), and 4-tert-butylpyridine (TBP, 0.5 mol). The weighed components were sequentially added to the acetonitrile solvent, stirred using a magnetic stirrer at 300 rpm for 20 min, and then subjected to ultrasonic treatment at 40 kHz for 20 min to obtain a homogeneous and transparent electrolyte system.

2.3.2.4 Assembly of the Battery

The battery assembly process is as follows: (1) A 60-μm-thick ethylene-vinyl acetate (EVA) hot-melt adhesive film was laser-cut into a "H" frame with an inner hole size of 0.8*0.8 cm; (2) The "H" frame was precisely aligned on the surface of the counter electrode (CE) to ensure that the active layer and the preset electrolyte inlet were located in the inner hole area of the frame; (3) The titanium dioxide photoanode, which had adsorbed the dye, was spatially aligned with the counter electrode; (4) The assembly was thermally pressed using a flatbed heat press at 120°C for 3 min to ensure complete sealing; (5) The electrolyte was fully infiltrated into the electrode gap through the counter electrode inlet under a vacuum-assisted injection method at -0.08 MPa; (6) After the injection, the inlet was sealed with UV-curing glue and a sealing plate, and then irradiated under UV light for 120 s to complete the curing, resulting in a fully packaged DSSCs device.

2.4 Testing and Characterization

2.4.1 Methods for Material Structure and Composition Characterization

2.4.1.1 Thermogravimetric Analysis Coupled with Mass Spectrometry (TG-MS)

A TG-MS system, consisting of a simultaneous thermal analyzer (STA 449 F3) and a quadrupole mass spectrometer (QMS 403 D), was used to monitor the thermal decomposition behavior of Y@P in a nitrogen atmosphere. The STA 449 F3 is equipped with a rhodium high-temperature furnace (room temperature to 900°C) and a high-sensitivity balance (resolution 0.1 μg), with a programmed heating rate of 10℃/min, to record the sample mass changes and thermal flow signals in real time. The evolved gases are introduced into the QMS 403D mass spectrometer via a constant-temperature transmission line for full mass number scanning from 1 to 300 amu, to quantitatively analyze the types and release dynamics of the thermal decomposition products through characteristic ion fragments, and to integrate the multi-dimensional TG-MS data synchronously with Proteus® software.

2.4.1.2 Scanning Electron Microscopy and Energy Dispersive Spectroscopy (SEM\EDS)

A field emission scanning electron microscope (Sigma 300, Carl Zeiss AG) was used to observe the surface morphology and pore structure of the carbon-based material at an acceleration voltage of 5 kV. An Oxford Instruments X-Max N 80 energy dispersive spectrometer was used for energy dispersive X-ray spectroscopy (EDX) to determine the atomic percentage and spatial distribution characteristics of the doped elements in the material, with a working distance maintained at 10 mm and a collection time of ≥180 s to ensure the signal-to-noise ratio.

2.4.1.3 X-ray Photoelectron Spectroscopy (XPS) A monochromatic Al Kα X-ray source (hv=1486.6 eV) was used, with the analysis chamber vacuum maintained at 5×10⁻⁹ mbar. Wide scans were performed in fixed analyzer energy mode (CAE=50 eV) with a step size of 1 eV; high-resolution spectra were obtained with a pass energy of 20 eV and a step size of 0.1 eV. Charge correction was performed using C 1s (284.8 eV), and peak deconvolution was processed using Avantage software.

2.4.1.4 Raman Spectroscopy (Raman)

A confocal micro-Raman spectrometer (inVia Qontor, Renishaw plc) was used to collect spectra in backscattering geometry. Experimental conditions: 514 nm Ar+ laser, 50× objective lens, grating lines 1800 lines·mm⁻¹, integration time 30 s, and 3 accumulated scans. Lorentzian and Gaussian mixed functions were used to fit the D band (~1350 cm⁻¹) and G band (~1580 cm⁻¹), and the defect density of carbon materials was quantitatively evaluated through the ID/IG ratio.

2.4.1.5 X-ray Diffraction Analysis (XRD)

A Bruker D8 Advance diffractometer (Cu Kα radiation, λ=1.5418 Å) was used for θ-2θ scanning. The test parameters were set as follows: tube voltage 40 kV, tube current 30 mA, divergence slit 0.6 mm, scanning step length 0.02°, scanning rate 4°·min⁻¹, and scanning range 10-80°. Phase identification was performed using Jade 9.0 software (ICDD PDF-4+ 2023 database), and the Rietveld whole-pattern fitting method was used to calculate the unit cell parameters.

2.4.1.6 Transmission Electron Microscopy (TEM)

A field emission transmission electron microscope (JEM-F200, JEOL Ltd.) was used, with a monochromatic electron beam in high-resolution mode (HRTEM) and spherical aberration correction to ≤1 μm, and lattice fringe spacing was analyzed using fast Fourier transform (FFT).

2.4.1.7 Specific Surface Area Analyzer (BET\BJH)

A JWGB SCI TECH BK132F gas adsorption analyzer was used to measure the BET specific surface area, adsorption-desorption isotherms, pore volume, and pore size distribution at 77 K using N2 adsorption experiments to analyze the pore structure of the material.

2.4.2 Methods for Characterizing Electrochemical Performance

2.4.2.1 Cyclic Voltammetry (CV)

The working electrode was a counter electrode (CE, effective area 0.25 cm²), the counter electrode was a platinum sheet (1 cm²), and the reference electrode was Ag/AgNO3 (0.01 M in AN). The electrolyte was an acetonitrile solution containing 0.1 mol·L⁻¹ LiClO4, 10 mmol·L⁻¹ LiI, and 1 mmol·L⁻¹ I2. Cyclic voltammetry was performed using a CHI 760E electrochemical workstation (Shanghai Chenhua) within the range of -0.4 to 1.2 V (vs. RHE) at a scan rate of 20 mV·s⁻¹, with data compensated for IR drop (iR Drop≥85%).

2.4.2.2 Electrochemical Impedance Spectroscopy (EIS)

Symmetric cells (CE|EVA|CE) were constructed for testing with a frequency range of 0.1 Hz to 100 kHz, an AC amplitude of 10 mV, and a DC bias of the open-circuit voltage. The equivalent circuit model (R(QR)(QR)) was established using Z-View software, and the charge transfer resistance (RCT) was obtained by non-linear least squares fitting.

2.4.2.3 Tafel Polarization Test

Linear scans were performed on a CHI 760E electrochemical workstation (Shanghai Chenhua) with a scan range of ±0.8 V and a scan rate of 10 mV·s⁻¹. The exchange current density (J0) was fitted from the Tafel region (η>120 mV) of the polarization curve, in accordance with the Butler-Volmer equation:

2.4.3 Photovoltaic Performance (J-V) Test

The J-V characteristics were tested under an AAA-grade solar simulator (CEL-S500, Beijing Zhongjiao Jinyuan): AM 1.5G spectral match (Class A), irradiance 100 mW·cm⁻² (calibrated with an NREL-certified Si reference cell), scan direction from open-circuit voltage to short-circuit current, with a delay time of 50 ms.
